# Supplementary material for: Plasmacytoid dendritic cells promote rotavirus-induced human and murine B cell responses
Source: JCI journal article supplement (doi:10.1172/jci60945), 2013-04-30

**Supplemental Figure 1: Titration of the pDC:B-cell ratio required for B-cell activation by rotavirus.** **A:** B-cell activation following coculture with pDCs at the indicated ratio was assessed by flow cytometry for expression of CD69 12h after mock (circles) or rotavirus (triangles) stimulus. **B:** Linear representation of (A).  $n=4$ , \*:  $p \leq 0.04$ ; \*\*:  $p \leq 0.008$ ; vs. mock; Mann-Whitney test.

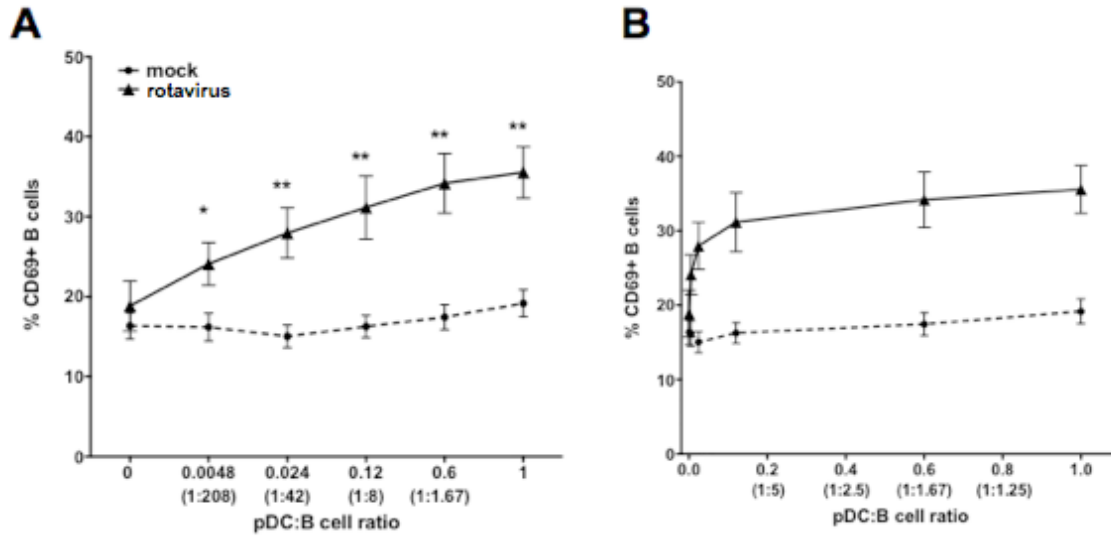

**Supplemental Figure 2: Rotavirus induces pDC expression of BAFF and APRIL.** BAFF (A) and APRIL (B) expression on purified pDCs 12h after the indicated stimulus in the presence or absence of brefeldin A was detected by flow cytometry. *n* = 3.

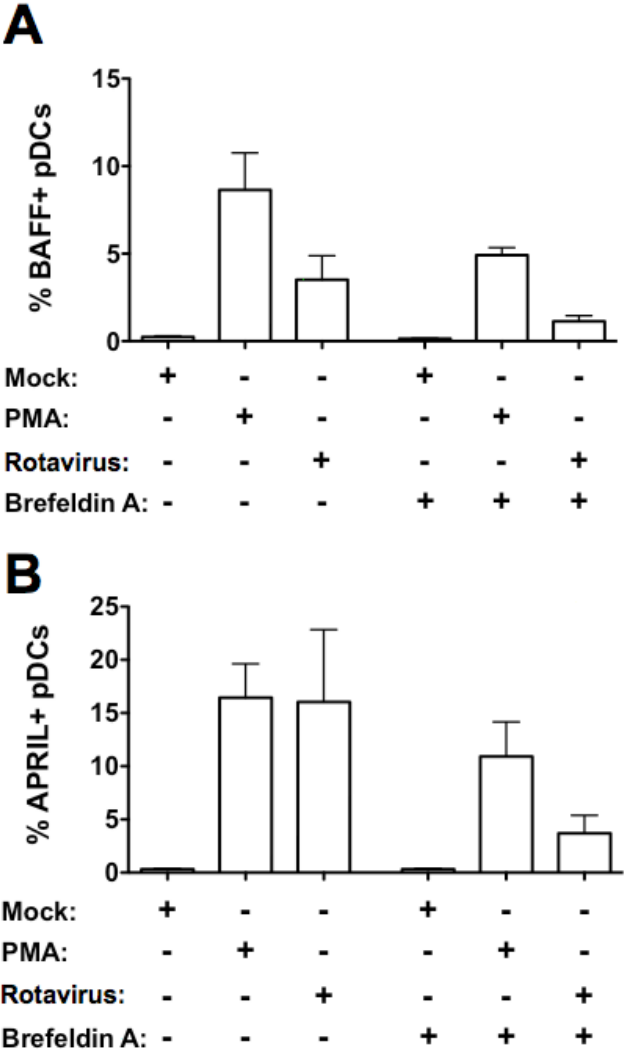

**Supplemental Figure 3: IFN $\omega$  and IFN $\beta$  induce human B-cell activation.** B-cell activation was assessed by flow cytometry analysis of CD69 expression by purified B cells cultured for 12h after stimulus with supernatants from mock- or rotavirus-stimulated pDCs or mock, IFN $\omega$ , or IFN $\beta$ , as indicated. \* :  $p \leq 0.05$ ; \*\* :  $p \leq 0.01$ ; vs. appropriate mock; repeated measures ANOVA with Tukey's multiple comparison test.  $n = 3$ .

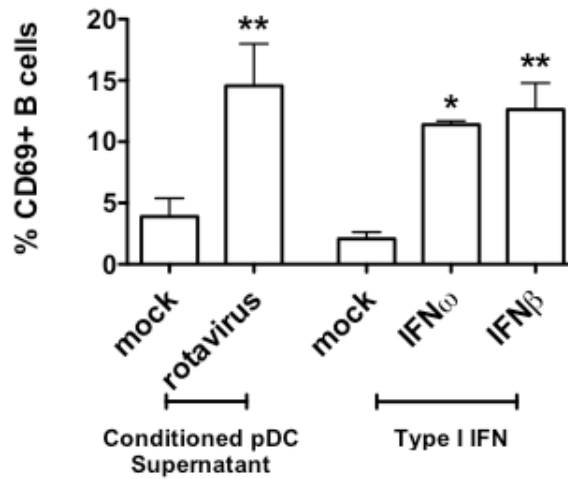

**Supplemental Figure 4: Antibody administration and pDC kinetics.** **A:** SiglecH, PDCA-1, or IgG2b isotype control antibody was administered i.p. at the indicated times. **B, C:** Antibody administration affects the percent of PDCA-1<sup>+</sup>lineage<sup>-</sup> cells at 3dpi (**B**) and SiglecH MFI at 7dpi (**C**) within the spleens of mock (white) or rotavirus (black) inoculated mice. **D:** Antibody or diphtheria toxin administration affects the percent of PDCA-1<sup>+</sup>SiglecH<sup>+</sup>lineage<sup>-</sup> cells within the indicated organs at the time of infection. **E:** The B cell population within the MLN is not affected by PDCA-1 administration. \*\*\*: p < 0.002; n=3-5 per group; t test.

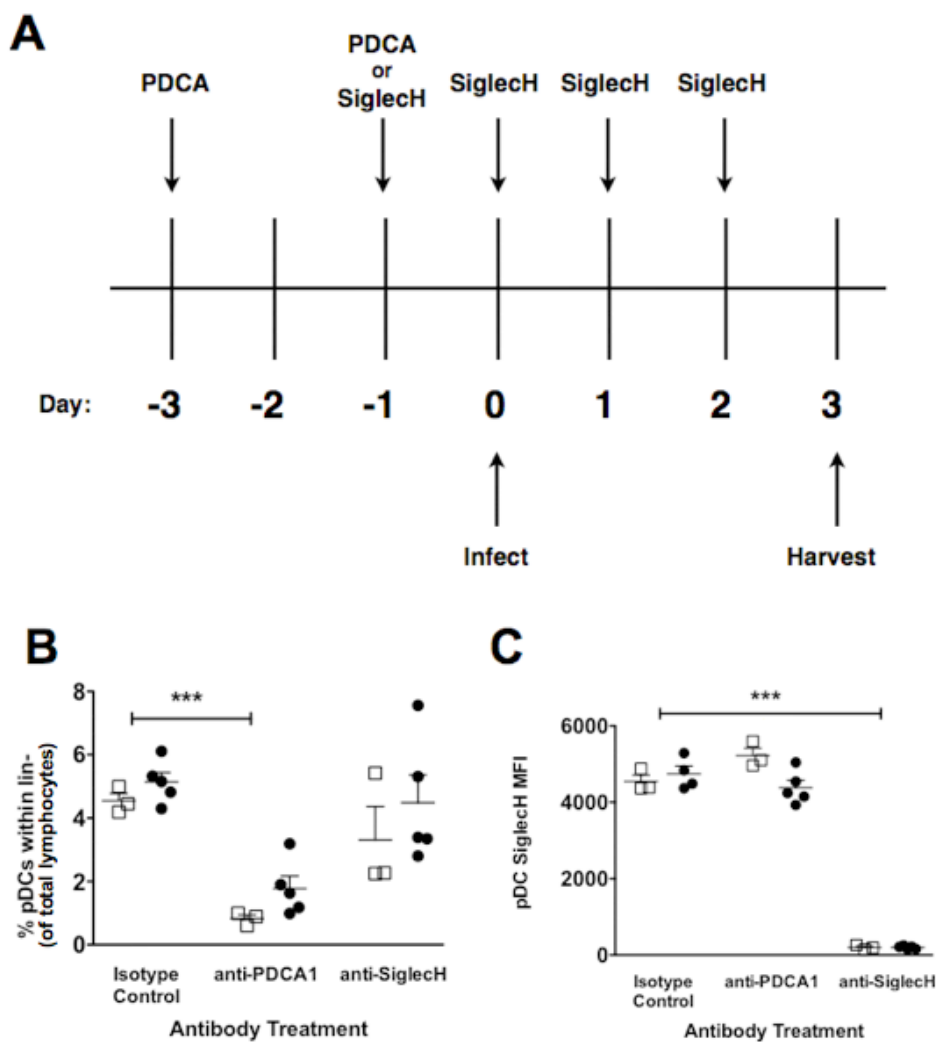

**D**

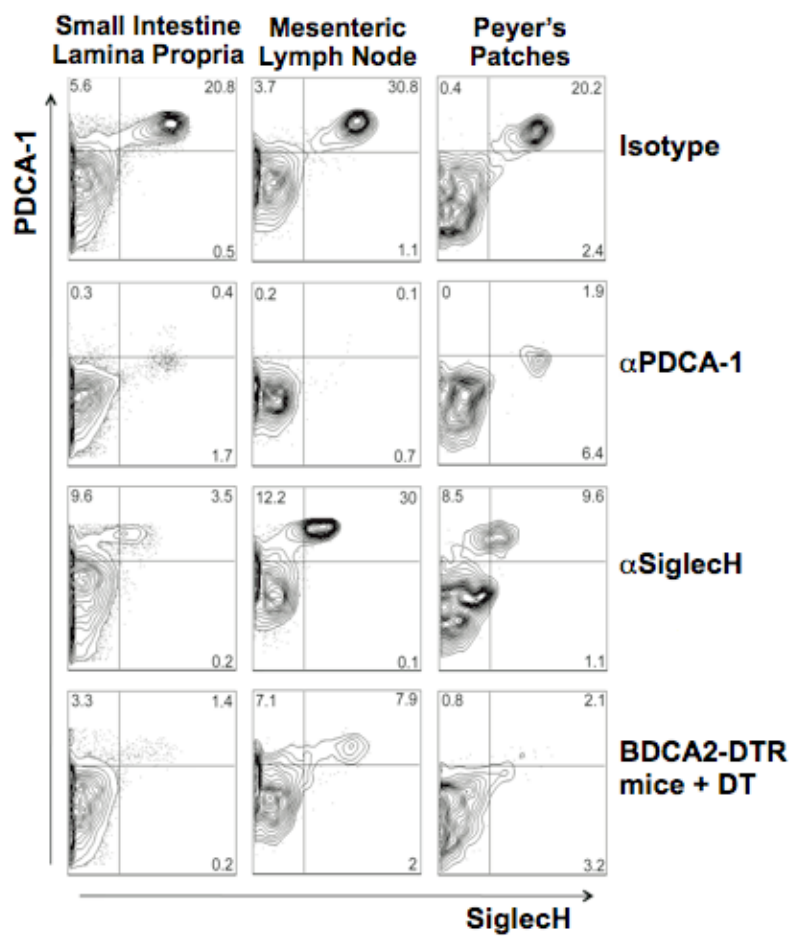

**E**

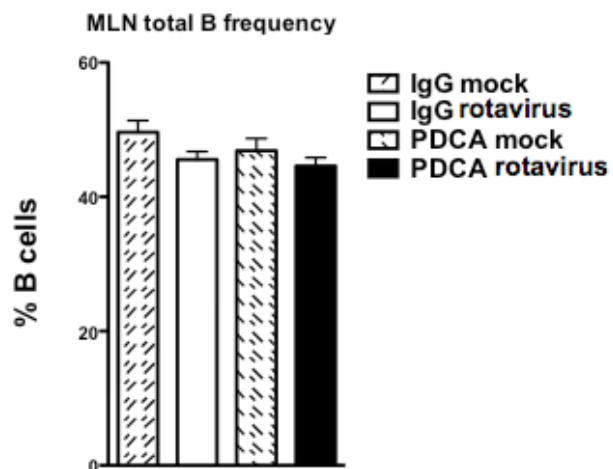

**Supplemental Figure 5: anti-SigleCH antibody prevents B-cell activation following in vivo rotavirus infection.** CD69 expression was assessed on B cells isolated from the Peyer's Patches (**A**) and mesenteric lymph node (**B**) of isotype-control or anti-SigleCH-treated mice 3 days following in vivo rotavirus infection. \*: p < 0.05; \*\*: p < 0.01; n=3-5 per group; t test.

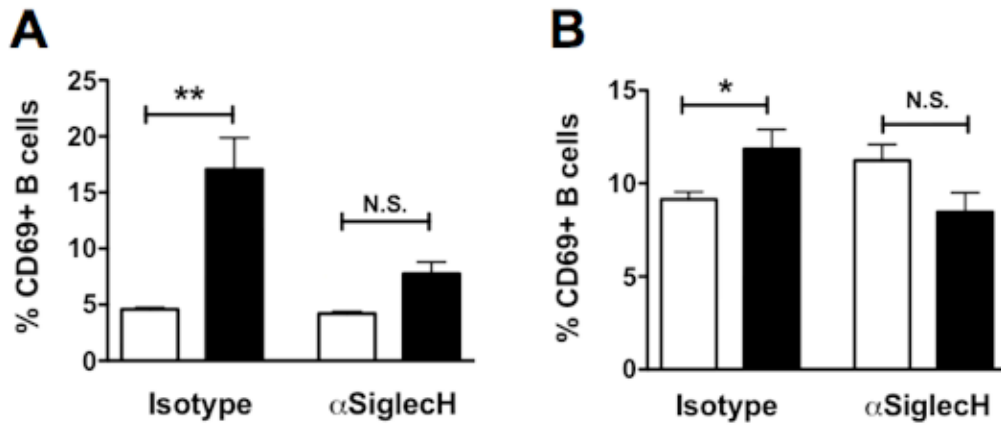

**Supplemental Figure 6: anti-SiglecH antibody inhibits type I IFN secretion by pDCs.** Murine pDCs were purified from FLT3L-treated bone marrow and stimulated with CpG 1585 or mock in the presence or absence of 5 µg/mL anti-SiglecH antibody. Resulting IFNα secretion was assessed by ELISA.

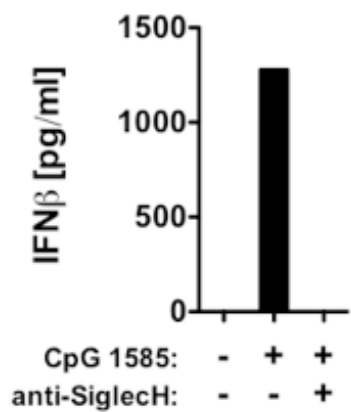

Supplement: sd1 [file 1]
